# Supplementary material
Source: Research Square preprint supplement (doi:10.21203/rs.3.rs-7874424/v1)
Supplement: Supplementary file 1 [file 57da16c45b6518dc0804717e.docx]

**Supplementary information**

**Supplementary information, Table. S1**

| **Table S1.** Sequences of primers for RT-qPCR (mouse) | | |
| --- | --- | --- |
| Primer | Forward (5'-3') | Reverse (5'-3') |
| *Gapdh* | AGGTCGGTGTGAACGGATTTG | TGTAGACCATGTAGTTGAGGTCA |
| *Alpl* | ACACCAATGTAGCCAAGAATGTCA | GATTCGGGCAGCGGTTACT |
| *Col1α1* | GACAGGCGAACAAGGTGACAGAG | CAGGAGAACCAGGAGAACCAGGAG |
| *Osx* | CCCTTCTCAAGCACCATTGG | AAGGGTGGGTAGTCATTTGCATA |
| *Dmt1* | CTAGACTGGGAGTGGTTACTGG | AGGATGACTCGTGGGACCTT |
| *Gpx4* | AGAGATCAAAGAGTTCGCCGC | TCTTCATCCACTTCCACAGCG |
| *Acsl4* | TGGCTACTTACCTTTGGCTCATGTG | ACAATCACCCTTGCTTCCCTTCTTG |
| *Slc7a11* | TGGGTGGAACTGCTCGTAAT | AGGATGTAGCGTCCAAATGC |
| *Ncoa4* | CCAGGAGCTGAGAGCTGAA | GCTGTAGGTGGCTTCTTGTG |
| *Cd44* | CTCAAGTGCGAACCAGGACAGTG | ATCAGAGCCAGTGCCAGGAGAG |
| *Cdkn1a* | CCTTGTCGCTGTCTTGCACTCTG | GCTGGTCTGCCTCCGTTTTCG |
| *Epas1* | ACCTTGGCACCCTACATCCCTATG | CGGCTGGAAGATGCTGGTCATG |
| *Ezh2* | AGAGTGGAAGCAGCGGAGGATAC | CATTATAGGCACCGAGGCGACTG |
| *Fabp4* | TCACCGCAGACGACAGGAAGG | ACATTCCACCAGCTTGTCACCATC |
| *Idh1* | GGGCGTCAAGTGTGCTACCATC | CTGAAGACAGTGCCACCCAGAATG |
| *Mapk3* | CTGCTGGACCGGATGTTAACCTTC | ACTGGCTCATCTGTCGGATCGTAG |
| *Pml* | TCCTCCTGCCCAACAACAATCATG | CTCACTGCTGCTATCGTCCAACTC |
| *Sqstm1* | AGGAGGAGACGATGACTGGACAC | TTGGTCTGTAGGAGCCTGGTGAG |
| *Stat3* | AATCTCAACTTCAGACCCGCCAAC | GCTCCACGATCCTCTCCTCCAG |
| *Wwtr1* | TCCACAGAACCACCCGACTCAG | GCTCCTCTTGACGCATCCTAATCC |
| *Yap1* | GGACTCCGAATGCAGTGTCTTCTC | GCCGCTGTCTGTGCTCTCATC |

**Supplementary information, Table. S2**

| **Table S2.** Sequences of primers for RT-qPCR (human) | | |
| --- | --- | --- |
| Primer | Forward (5'-3') | Reverse (5'-3') |
| *GAPDH* | ACATCAAGAAGGTGGTGAAGCA | CGTCAAAGGTGGAGGAGTGG |
| *TFR1* | TCAGCAGAGACCACCGAAGACT | GACCACACTTGCCCGCTATGTA |
| *FTH1* | TGAAGCTGCAGAACCAACGAGG | GCACACTCCATTGCATTCAGCC |
| *HO-1* | CCAGGCAGAGAATGCTGAGTTC | AAGACTGGGCTCTCCTTGTTGC |

**Supplementary information, Table. S3**

| **Table S3.** Brand and dilution ratio of antibodies for Western blot | | |
| --- | --- | --- |
| Antibody | Manufacturer and Catalog | Dilution Ratio |
| Anti-GAPDH Antibody (GAPDH) | Immunoway, China, YM8287 | 1: 1000 |
| Anti-Heme Oxygenasel Antibody (HO-1) | HUABIO, China, ET1604-45 | 1: 1000 |
| Anti-Transferrin Receptor (CD71) Antibody (TFR1) | HUABIO, China, ET1702-06 | 1: 1000 |
| Anti-Phospho-Nuclear factor erythroid 2-related factor 2 Antibody (p-NRF2) | HUABIO, China, ET1608-28 | 1:5,000 |
| Anti-Glutathione Peroxidase 4 Antibody (GPX4) | HUABIO, China, ET1706-45 | 1:500 |
| Anti-Yes-associated protein 1 Antibody (YAP1) | Affinity Biosciences, China, AF6328 | 1:1000 |
| Anti-Phospho-Yes-associated protein 1 Antibody (p-YAP1) | Affinity Biosciences, China, AF3328 | 1:1000 |
| HRP Conjugated Goat anti-Rabbit IgG Antibody | HUABIO, China, HA1001 | 1: 50000 |
